# Supplementary material
Source: bioRxiv or medRxiv preprint supplement (https://medrxiv.org/highwire/filestream/89774/field_highwire_adjunct_files/0/19009464-1.pdf)
Supplement: Supplementary file [file 19009464-1.pdf]

1 Supplementary Figures

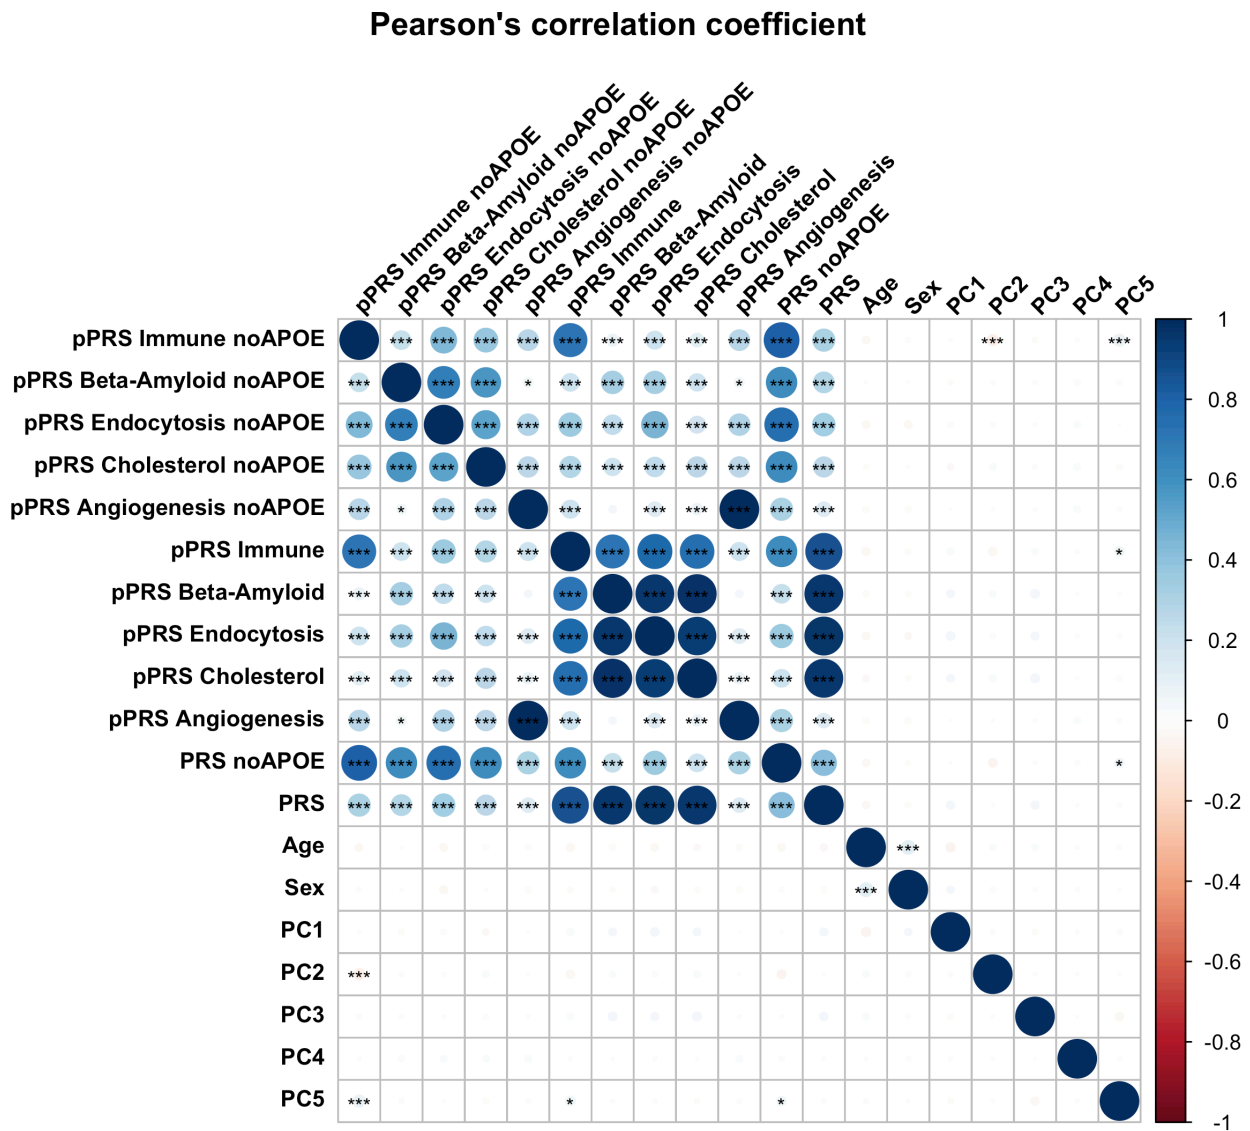

2

3 **Figure S1: Correlation plot of the (p)PRS and covariates:** the figure shows the correlation between the pathway-PRS  
 4 (respectively with and without *APOE* variants), the full-PRS (respectively with and without *APOE* variants), ages (ages  
 5 at study inclusion for controls, ages at diagnosis for AD cases) and the 5 principal components derived from the  
 6 population stratification analysis. We used Pearson correlation and *p-values* were adjusted with Holm-Bonferroni  
 7 correction.

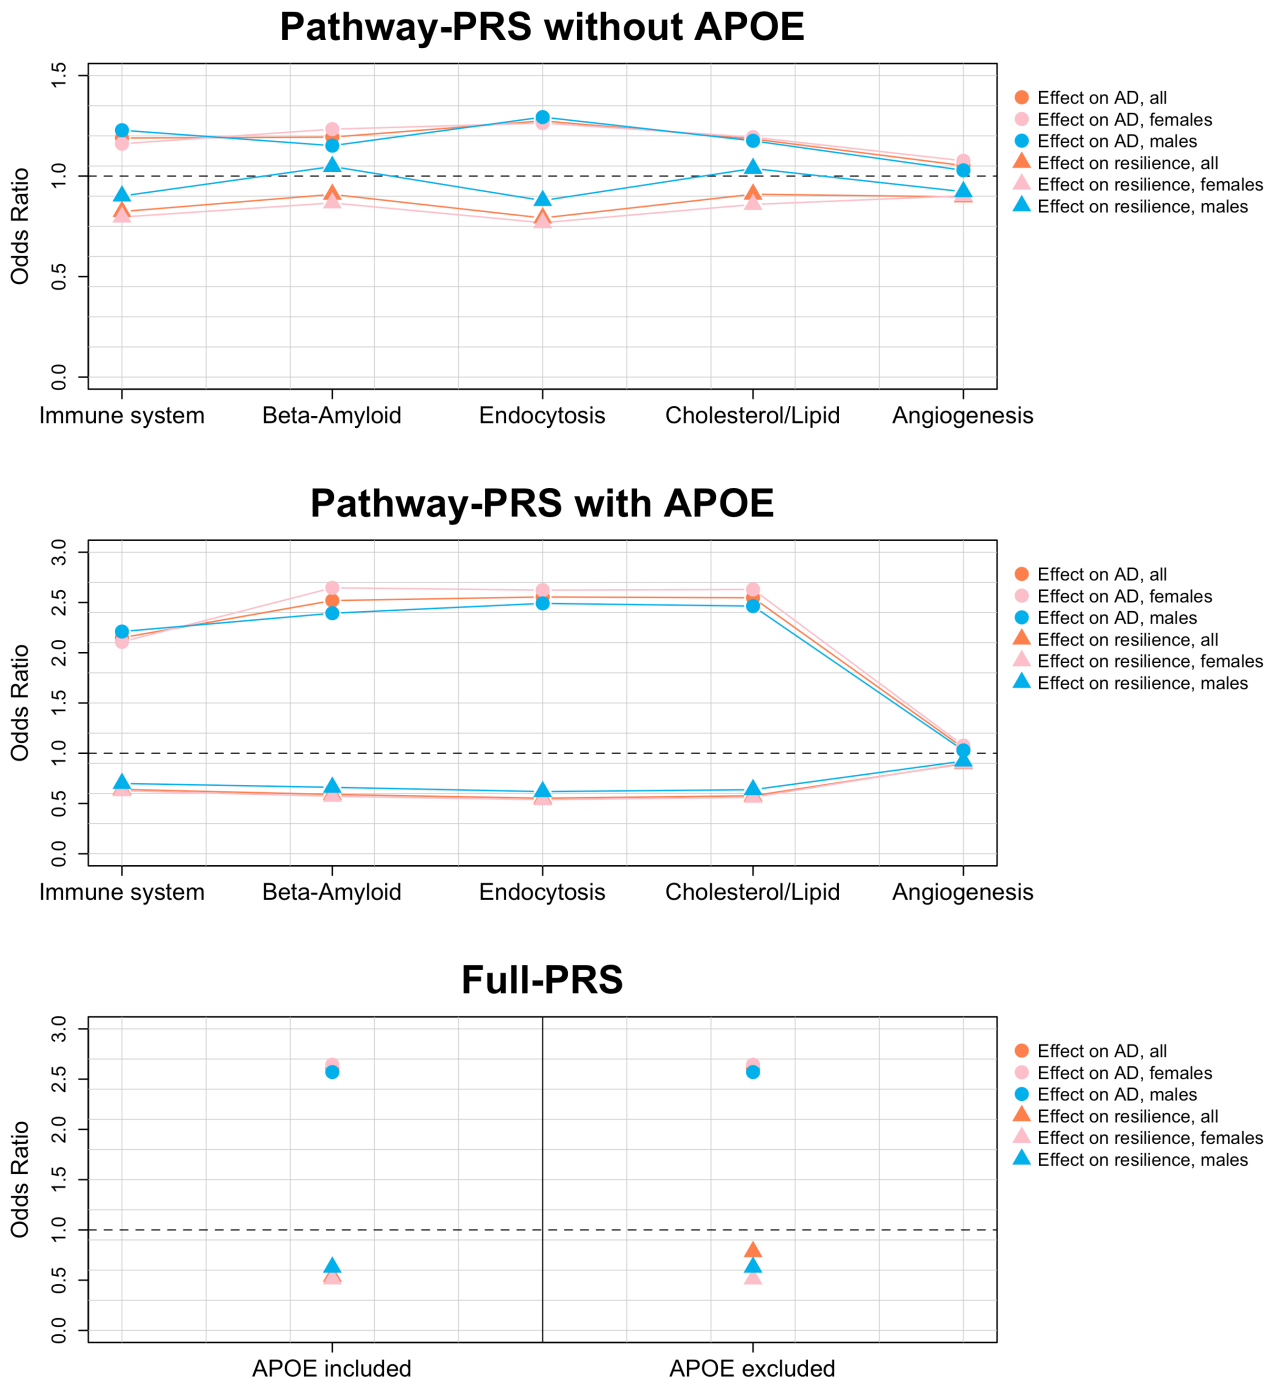

8

9 **Figure S2: Sex-stratified analysis of the (p)PRS:** the figure shows the sex-stratified analyses in the context of the  
 10 overall analysis, respectively for the pathway-PRS (including and excluding *APOE* variants) and the Full-PRS  
 11 (including and excluding *APOE* variants). For each PRS (pathway-PRS or Full-PRS) we report both the odds ratio for  
 12 AD and those for AD-resilience.

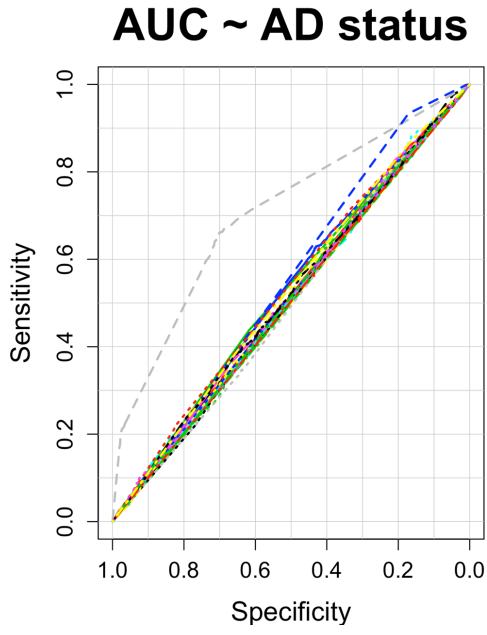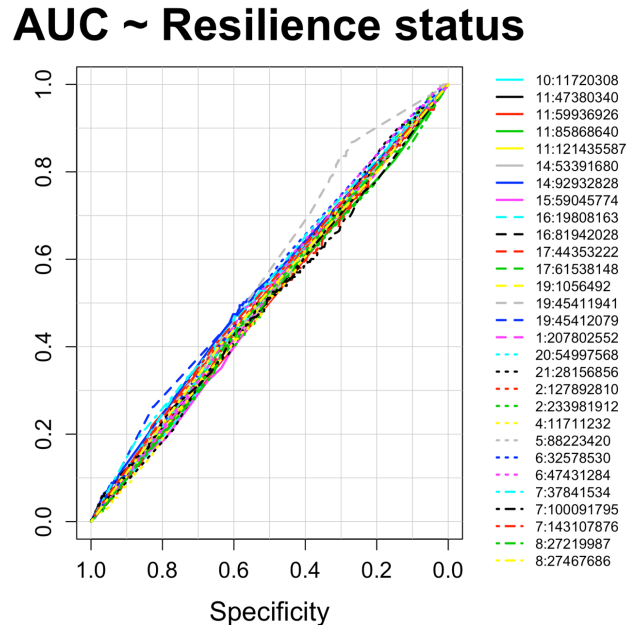

13

14 **Figure S3:** Area under ROC curve for classification of AD or AD-Resilience status, for each variant: the figure  
 15 shows the quality of the classification of AD and AD-Resilience status using single-variants.

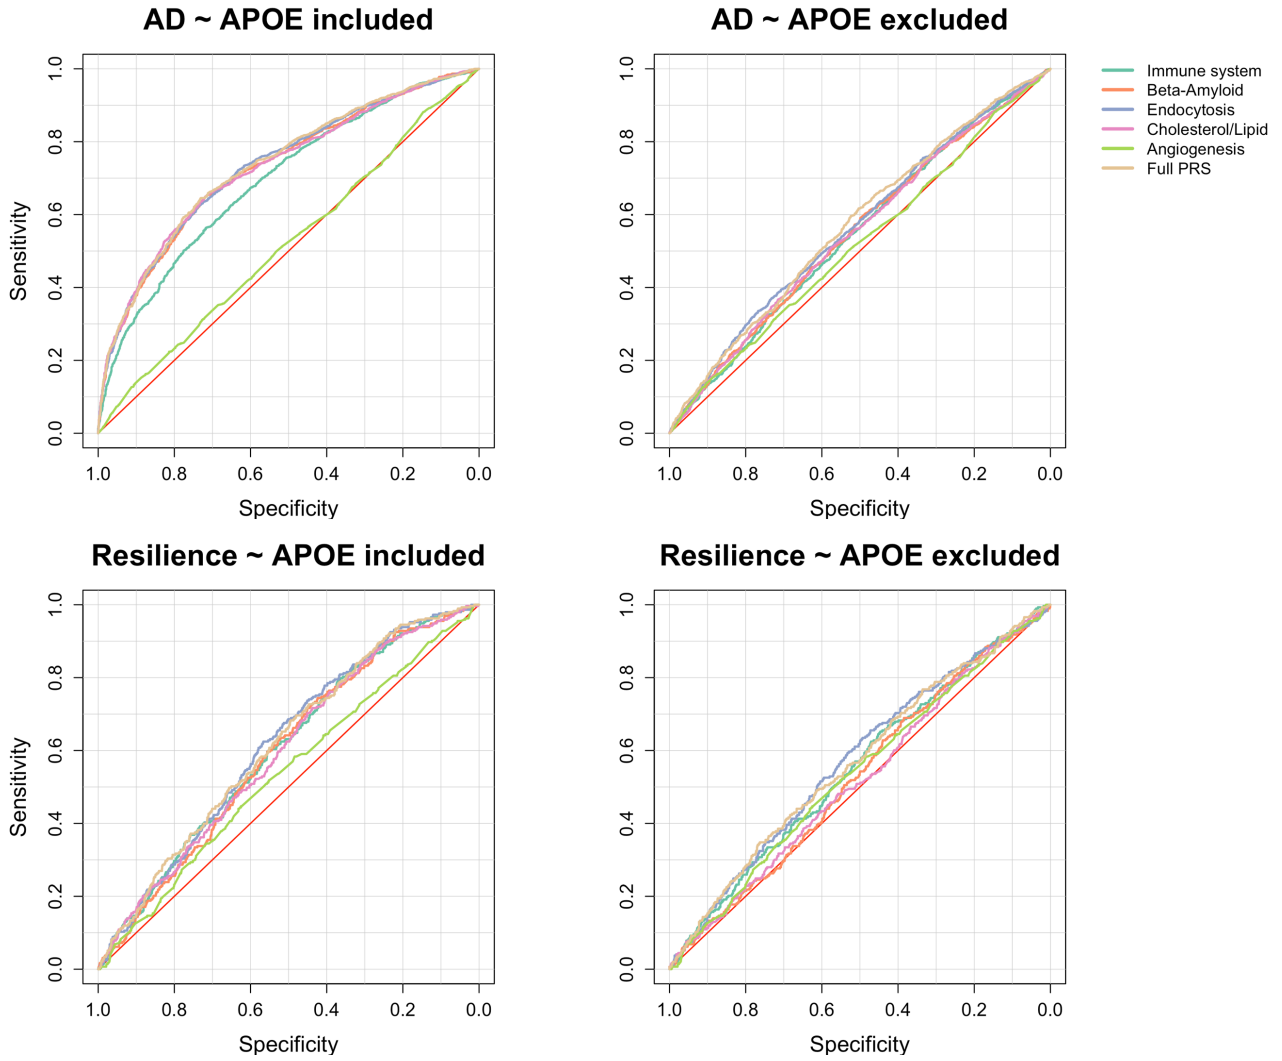

16

17 **Figure S4: Area under ROC curve for classification of AD and AD-Resilience status, for each PRS and pPRS: the**  
 18 **figure shows the quality of the classification of AD and AD-Resilience status using PRS and pPRS.**

19
